# Supplementary material
Source: PubMed Central journal article supplement (PMC4884444)
Supplement: NIHMS68243-supplement-Supplementary_information.pdf [file NIHMS68243-supplement-Supplementary_information.pdf]

## Supplementary information

### Sensitive detection and glycoprofiling of a prostate specific antigen (PSA) using impedimetric assays

D. Pihíková,<sup>a</sup> Š. Belický,<sup>a</sup> P. Kasák<sup>b</sup>, T. Bertok<sup>a</sup> and J. Tkac<sup>a,\*</sup>

<sup>a</sup> Department of Glycobiotechnology, Institute of Chemistry, Slovak Academy of Sciences, Dubravska cesta 9, Bratislava, 845 38, Slovak Republic

<sup>b</sup> Centre for Advanced Materials, Qatar University, P.O. Box 2713, Doha, Qatar

\* Corresponding author: [Jan.Tkac@savba.sk](mailto:Jan.Tkac@savba.sk)

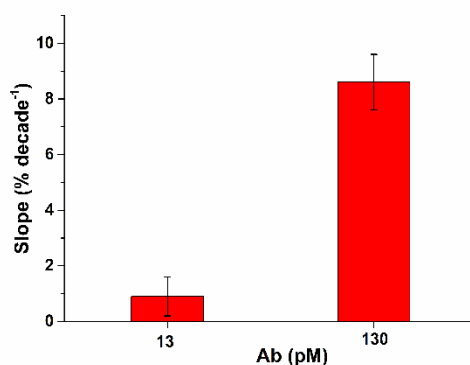

**Figure S1:** Calibration slope for detection of PSA with an impedimetric immunosensor prepared either by covalent immobilisation of an antibody from a stock solution of 13 pM or 130 pM on a mixed SAM composed of MUA and MCH of 1:3.

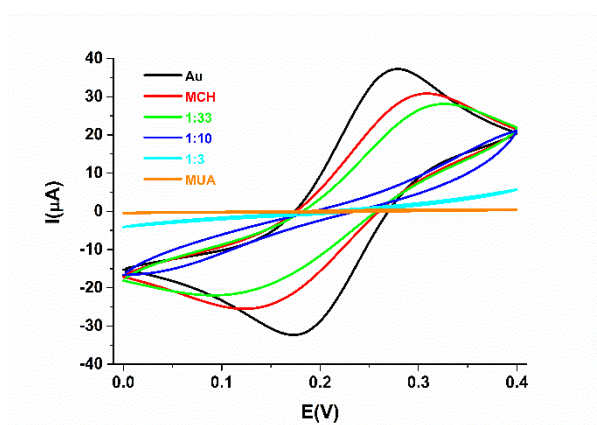

**Figure S2:** CV of ferricyanide as a redox probe at various SAMs i.e. pure SAMs composed of MUA or MCH and a mixed SAMs composed of MUA and MCH with a different ratio (1:33, 1:10 and 1:3). Moreover CV of ferricyanide on a bare gold surface is shown, as well.

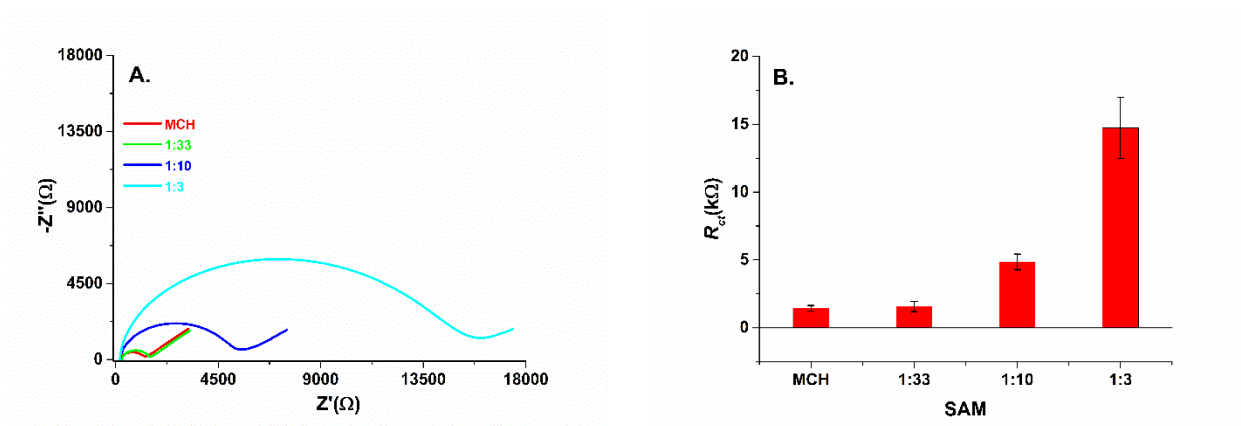

**Figure S3:** **A)** Nyquist plots obtained at various SAMs i.e. pure SAMs composed of MCH and a mixed SAMs composed of MUA and MCH with a different ratio (1:33, 1:10 and 1:3). **B)** Typical values of  $R_{ct}$  obtained at various SAM layers.

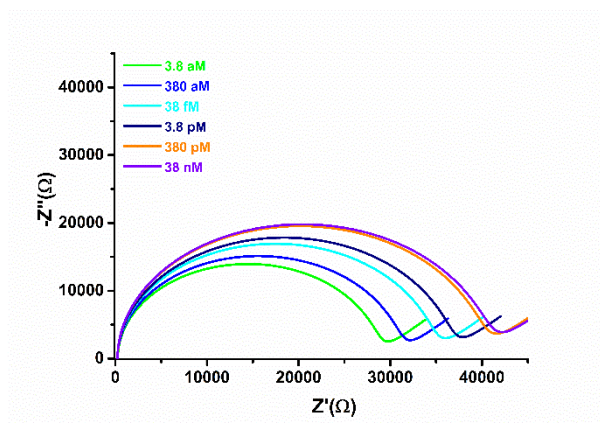

**Figure S4:** Nyquist plot for construction of a calibration curve for PSA analysis with an impedimetric immunosensor prepared by covalent immobilisation of an antibody from a stock solution of 130 pM.

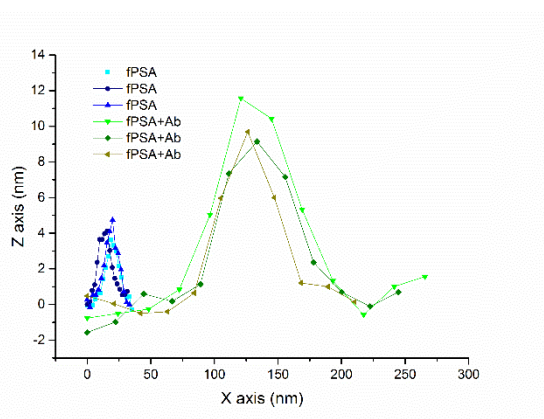

**Figure S5:** AFM profile of PSA proteins attached to the surface (fPSA) and features appeared after incubation of the PSA modified surface with an antibody (fPSA+Ab).

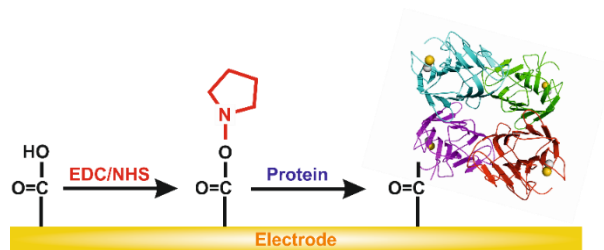

**Figure S6:** Scheme of covalent protein immobilisation on Au electrode modified by a mixed SAM containing  $-\text{COOH}$  groups using EDC/NHS coupling reagents.

**Table S1:** Results obtained by fitting Nyquist plot shown in Fig. 3A with an equivalent circuit [R(C[RW])] with relevant fitted elements shown.

| $R_s$    | RSD  | $R_{ct}$ | RSD  | C        | RSD | $\chi^2$ |
|----------|------|----------|------|----------|-----|----------|
| $\Omega$ | %    | $\Omega$ | %    | F        | %   |          |
| 730      | 0.85 | 13500    | 0.91 | 1.77E-07 | 1.1 | 0.051    |

$R_s$  – solution resistance,  $R_{ct}$  – charge transfer resistance, C – capacitance,  $\chi^2$  – deviation of fitted values from real ones

**Table S2:** Results obtained by fitting Nyquist plot shown in Fig. 3B with an equivalent circuit [R(Q[RW])] with relevant fitted elements shown.

| $R_s$    | RSD  | $R_{ct}$ | RSD  | n    | RSD  | $\chi^2$ |
|----------|------|----------|------|------|------|----------|
| $\Omega$ | %    | $\Omega$ | %    |      | %    |          |
| 720      | 0.51 | 13800    | 0.55 | 0.97 | 0.35 | 0.015    |

$R_s$  – solution resistance,  $R_{ct}$  – charge transfer resistance, n – constant,  $\chi^2$  – deviation of fitted values from real ones
